# Supplementary material for: Anion coordination selective [Mn3] and [Mn4] assemblies: synthesis, structural diversity, magnetic properties and catechol oxidase activity
Source: Royal Society of Chemistry journal article supplement (doi:10.1039/c5dt01157d), 2015-01-01
Supplement: c5dt01157d1.pdf [file c5dt01157d1.pdf]

## Electronic Supplementary Information

### **Anion Coordination Selective [Mn<sub>3</sub>] and [Mn<sub>4</sub>] Assemblies: Synthesis, Structural Diversity, Magnetic Properties and Catechol Oxidase Activity**

Moumita Pait,<sup>a</sup> Michael Shatruk<sup>b</sup> and Debashis Ray<sup>a,†</sup>

<sup>a</sup>Department of Chemistry, Indian Institute of Technology, Kharagpur 721 302, India

Fax: (+91) 3222-82252; Tel: (+91) 3222-283324; E-mail: [dray@chem.iitkgp.ernet.in](mailto:dray@chem.iitkgp.ernet.in)

<sup>b</sup>Department of Chemistry & Biochemistry, Florida State University, Tallahassee, FL 32306

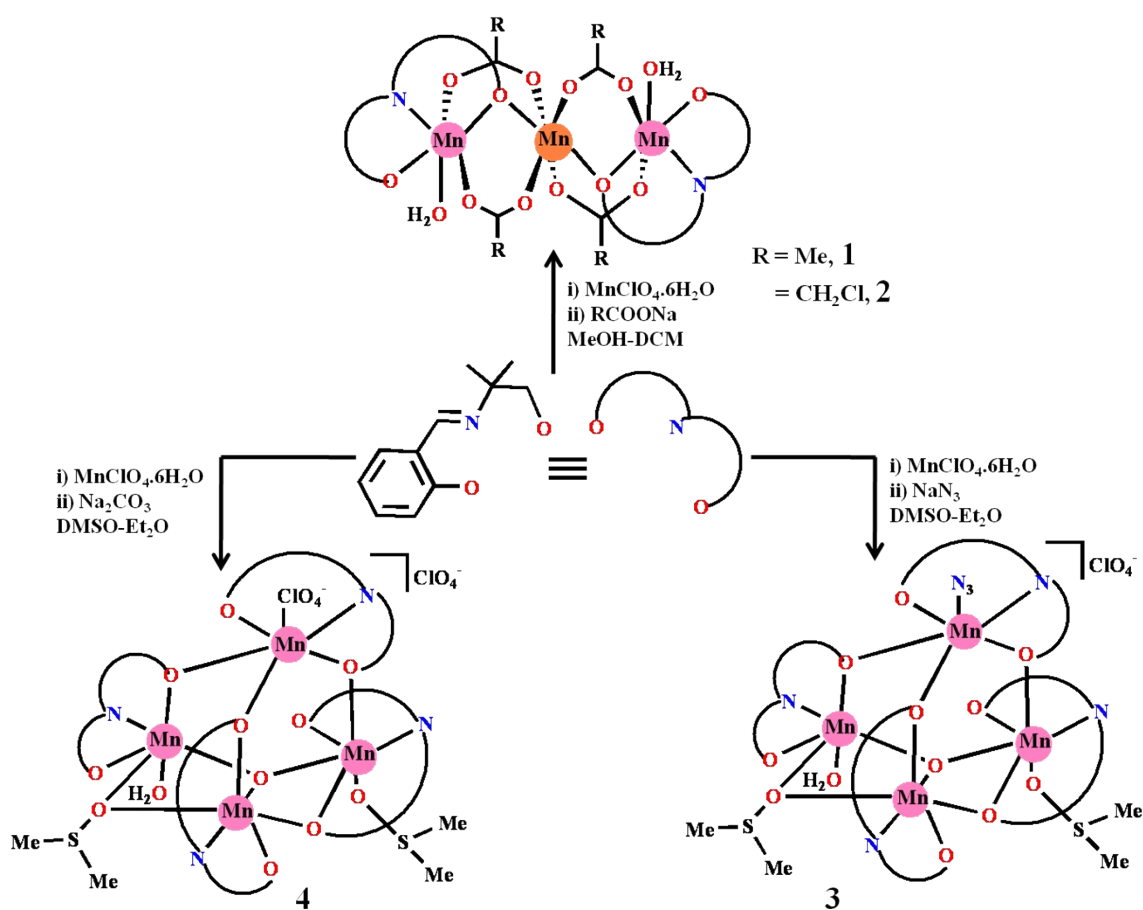

Scheme S1. Synthesis of complexes

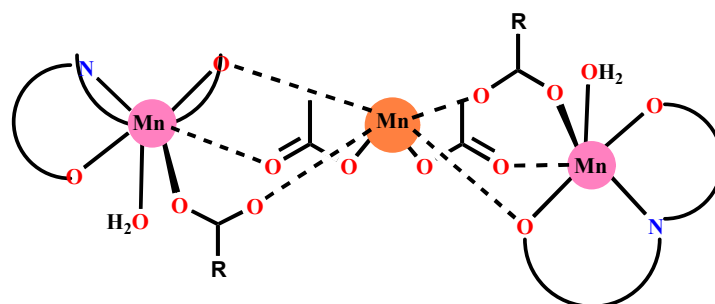

**Scheme S2.** Formation of complexes **1** and **2** through aggregation

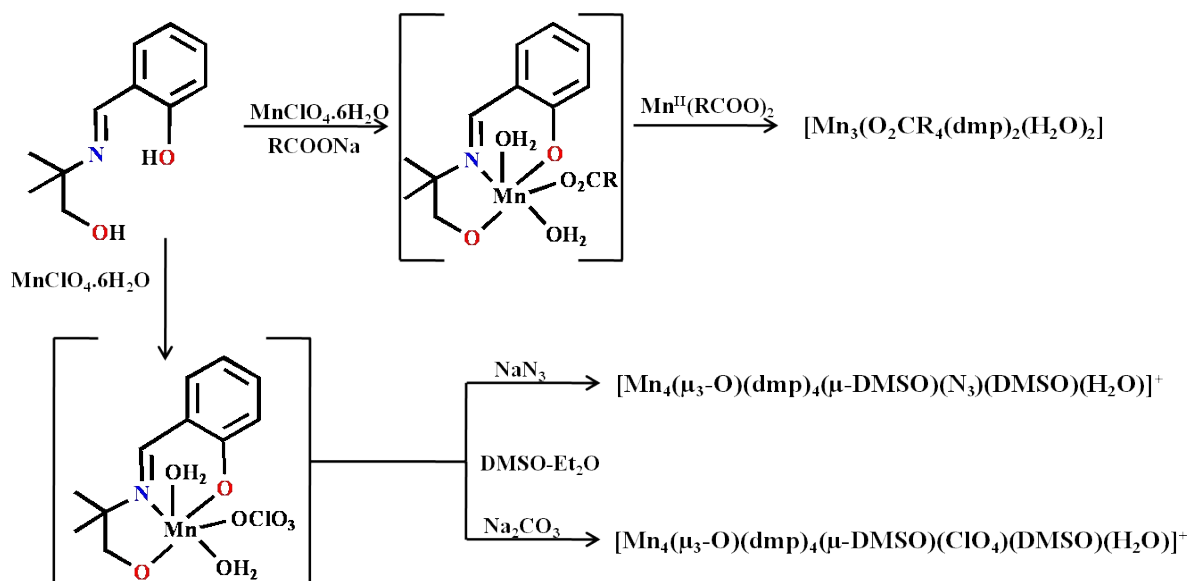

**Scheme S3.** Proposed reaction sequence for formation of the trimers and tetramers

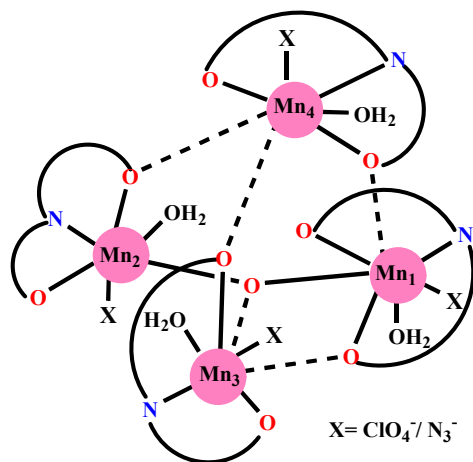

**Scheme S4.** Formation of complexes **3** and **4**

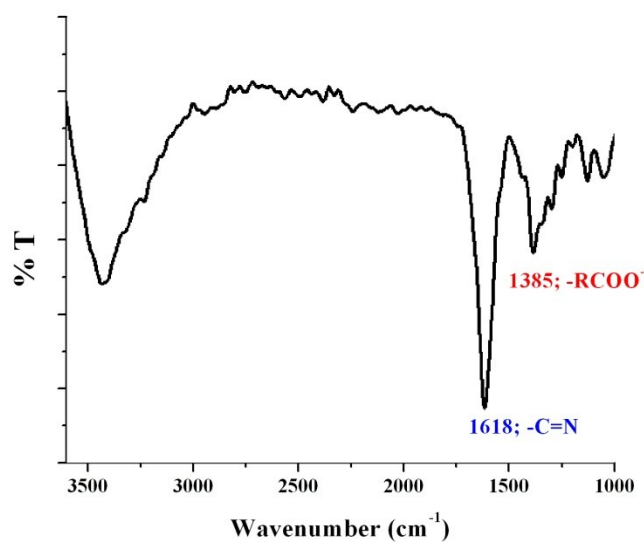

**Fig. S1** FT-IR spectrum of complex **2**

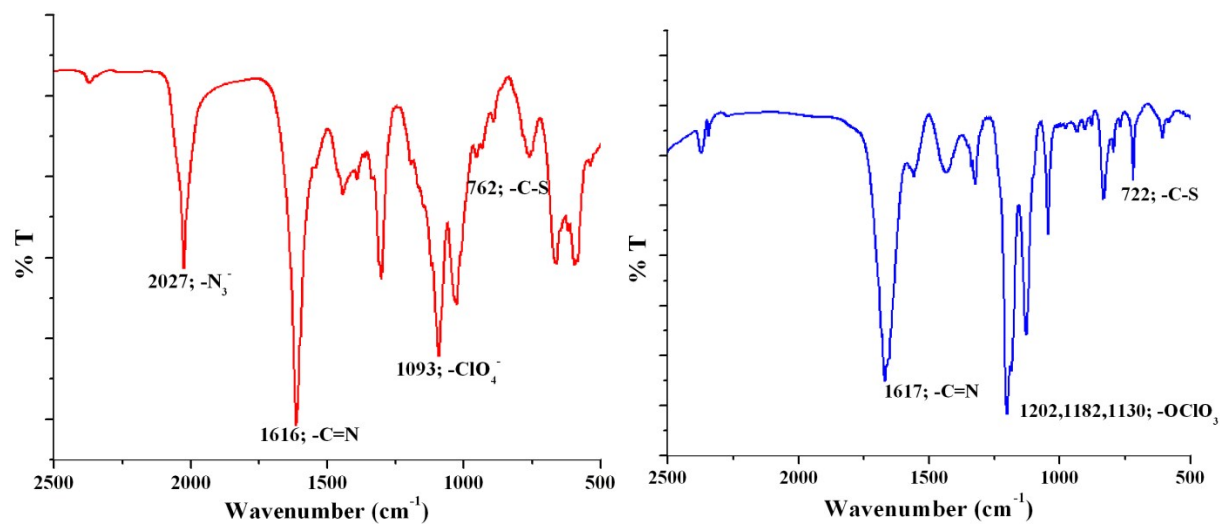

**Fig. S2** FT-IR spectrum of complexes 3 (left) and 4 (right).

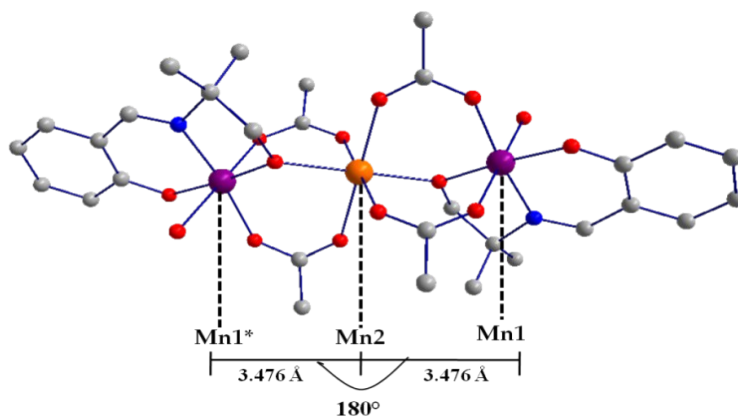

**Fig. S3** Linear trinuclear units in complex 1

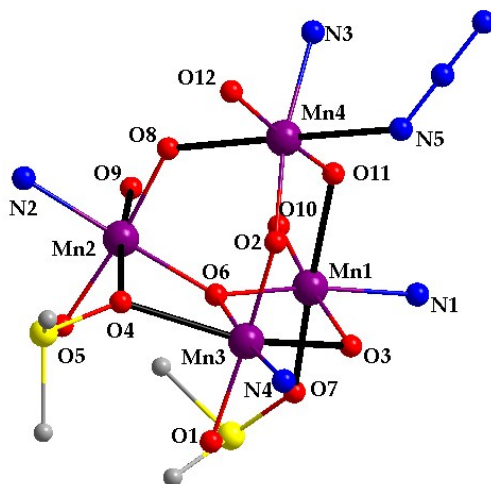

**Fig. S4** Core structure of **3** with the O-Mn-O Jahn-Teller axis on the terminal atoms indicated as black bonds.

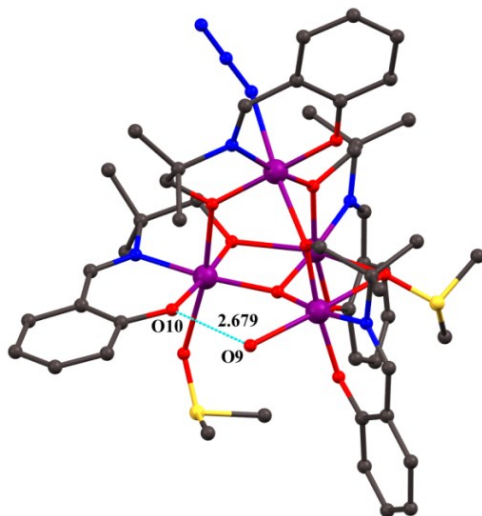

**Fig. S5.** Intramolecular H-bond present in complex **3**.

**Table S1** Selected bond angles (°) for **1**·2H<sub>2</sub>O and **2**·H<sub>2</sub>O·MeOH

| 1·2H <sub>2</sub> O |           |             |           |
|---------------------|-----------|-------------|-----------|
| O2-Mn1-O1           | 174.68(7) | N1-Mn1-O7   | 85.46(8)  |
| O2-Mn1-O4           | 98.55(7)  | O6-Mn1-O7   | 179.60(8) |
| O1-Mn1-O4           | 86.58(7)  | O4-Mn1-O7   | 84.95(8)  |
| O2-Mn1-N1           | 83.24(8)  | O3-Mn2-O2   | 89.11(7)  |
| O1-Mn1-N1           | 91.47(8)  | O3*-Mn2-O2* | 90.89(7)  |
| O4-Mn1-N1           | 170.19(8) | O3-Mn2-O5*  | 87.55(8)  |

|           |          |             |          |
|-----------|----------|-------------|----------|
| O2-Mn1-O6 | 91.32(7) | O1-Mn1-O7   | 90.69(9) |
| O1-Mn1-O6 | 89.60(8) | O3-Mn2-O5   | 92.45(8) |
| O4-Mn1-O6 | 95.34(8) | O2-Mn2-O5   | 88.71(7) |
| N1-Mn1-O6 | 94.26(8) | O2*-Mn2-O5* | 91.29(7) |
| O2-Mn1-O7 | 88.36(9) |             |          |

| <b>2·H<sub>2</sub>O·MeOH</b> |            |             |            |
|------------------------------|------------|-------------|------------|
| O2-Mn1-O1                    | 173.82(18) | O2-Mn1-O7   | 88.98(19)  |
| O1-Mn1-O4                    | 86.33(18)  | O4-Mn1-O7   | 85.4(2)    |
| O2-Mn1-O4                    | 99.71(17)  | N1-Mn1-O7   | 91.5(2)    |
| O1-Mn1-N1                    | 90.6(2)    | O6-Mn1-O7   | 170.06(18) |
| O2-Mn1-N1                    | 83.26(19)  | O2-Mn2-O3   | 91.34(15)  |
| O4-Mn1-N1                    | 175.67(19) | O2-Mn2-O3*  | 88.66(15)  |
| O1-Mn1-O6                    | 90.5(2)    | O2-Mn2-O5   | 88.97(17)  |
| O2-Mn1-O6                    | 91.37(18)  | O2-Mn2-O5*  | 91.03(17)  |
| O4-Mn1-O6                    | 84.8(2)    | O3-Mn2-O5   | 87.3(2)    |
| N1-Mn1-O6                    | 98.4(2)    | O3*-Mn2-O5* | 92.7(2)    |
| O1-Mn1-O7                    | 90.2(2)    |             |            |

**Table S2** Bond-Valence Sums for the Mn Atoms of Complexes **1–4**

| Complex  | Atom | Mn <sup>II</sup> | Mn <sup>III</sup> |
|----------|------|------------------|-------------------|
| <b>1</b> | Mn1  | 3.25             | <u>3.02</u>       |
|          | Mn2  | <u>2.04</u>      | 1.86              |
| <b>2</b> | Mn1  | 3.27             | <u>3.02</u>       |
|          | Mn2  | <u>2.07</u>      | 1.90              |
| <b>3</b> | Mn1  | 3.10             | <u>2.87</u>       |
|          | Mn2  | 3.05             | <u>2.82</u>       |
|          | Mn3  | 3.01             | <u>2.79</u>       |
|          | Mn4  | 3.05             | <u>2.84</u>       |
| <b>4</b> | Mn1  | 3.16             | <u>2.92</u>       |
|          | Mn2  | 3.25             | <u>3.01</u>       |
|          | Mn3  | 3.16             | <u>2.95</u>       |
|          | Mn4  | 3.13             | <u>2.91</u>       |

**Table S3** Selected bond angles (°) for **3·ClO<sub>4</sub>·DMSO** and **4·ClO<sub>4</sub>·DMSO**

| <b>3·ClO<sub>4</sub>·DMSO</b> |            |             |            |
|-------------------------------|------------|-------------|------------|
| O3-Mn1-O6                     | 84.52(17)  | O1-Mn3-O6   | 95.64(19)  |
| O6-Mn1-O10                    | 100.75(18) | O6-Mn3-O2   | 93.33(17)  |
| O3-Mn1-N1                     | 83.2(2)    | O1-Mn3-N3   | 89.3(2)    |
| O10-Mn1-N1                    | 91.6(2)    | O2-Mn3-N3   | 81.9(2)    |
| O3-Mn1-O11                    | 93.21(17)  | O1-Mn3-O3   | 96.06(19)  |
| O6-Mn1-O11                    | 88.98(16)  | O6-Mn3-O3   | 76.42(16)  |
| O10-Mn1-O11                   | 85.87(18)  | O2-Mn3-O3   | 92.31(17)  |
| N1-Mn1-O11                    | 92.91(19)  | N3-Mn3-O3   | 101.85(19) |
| O3-Mn1-O7                     | 94.97(19)  | O1-Mn3-O4   | 90.91(19)  |
| O6-Mn1-O7                     | 98.64(18)  | O6-Mn3-O4   | 79.73(17)  |
| O10-Mn1-O7                    | 85.3(2)    | O2-Mn3-O4   | 84.33(17)  |
| N1-Mn1-O7                     | 81.3(2)    | N3-Mn3-O4   | 101.5(2)   |
| O3-Mn1-O10                    | 174.62(18) | O1-Mn3-O2   | 168.94(19) |
| O6-Mn1-N1                     | 167.7(2)   | O6-Mn3-N3   | 174.9(2)   |
| O11-Mn1-O7                    | 169.31(18) | O3-Mn3-O4   | 155.67(17) |
| O8-Mn2-O6                     | 93.02(18)  | O12-Mn4-O2  | 91.70(19)  |
| O5-Mn2-O6                     | 93.23(18)  | O11-Mn4-O2  | 94.94(18)  |
| O8-Mn2-N2                     | 83.0(2)    | O12-Mn4-N4  | 90.2(2)    |
| O5-Mn2-N2                     | 90.3(2)    | O11-Mn4-N4  | 83.7(2)    |
| O8-Mn2-O9                     | 88.98(19)  | O12-Mn4-O8  | 84.71(19)  |
| O5-Mn2-O9                     | 94.8(2)    | O11-Mn4-O8  | 92.69(18)  |
| O6-Mn2-O9                     | 96.31(17)  | O2-Mn4-O8   | 91.74(17)  |
| N2-Mn2-O9                     | 90.3(2)    | N4-Mn4-O8   | 98.83(19)  |
| O8-Mn2-O4                     | 92.62(18)  | O12-Mn4-N5  | 90.9(2)    |
| O5-Mn2-O4                     | 84.3(2)    | O11-Mn4-N5  | 92.0(2)    |
| O6-Mn2-O4                     | 77.96(16)  | O2-Mn4-N5   | 85.3(2)    |
| N2-Mn2-O4                     | 95.55(19)  | N4-Mn4-N5   | 84.2(2)    |
| O8-Mn2-O5                     | 172.3(2)   | O12-Mn4-O11 | 172.9(2)   |
| O6-Mn2-N2                     | 172.3(2)   | O2-Mn4-N4   | 169.4(2)   |
| O9-Mn2-O4                     | 174.12(17) | O8-Mn4-N5   | 174.7(2)   |
| Mn1-O6-Mn2                    | 136.0(2)   | Mn1-O3-Mn3  | 94.96(17)  |
| Mn1-O6-Mn3                    | 103.17(18) | Mn1-O11-Mn4 | 125.5(2)   |
| Mn2-O6-Mn3                    | 115.3(2)   | Mn2-O8-Mn4  | 127.4(2)   |
| Mn2-O4 <sub>DMSO</sub>        | 85.83(15)  | Mn3-O2-Mn4  | 130.4(2)   |

|                               |           |             |          |
|-------------------------------|-----------|-------------|----------|
| Mn3                           |           |             |          |
| <b>4·ClO<sub>4</sub>·DMSO</b> |           |             |          |
| O3-Mn1-O6                     | 84.7(2)   | O1-Mn3-O6   | 95.1(2)  |
| O6-Mn1-O10                    | 101.4(2)  | O6-Mn3-O2   | 93.6(2)  |
| O3-Mn1-N1                     | 82.5(2)   | O1-Mn3-N3   | 89.5(3)  |
| O10-Mn1-N1                    | 91.4(2)   | O2-Mn3-N3   | 82.0(2)  |
| O3-Mn1-O11                    | 92.8(2)   | O1-Mn3-O3   | 96.5(2)  |
| O6-Mn1-O11                    | 87.61(19) | O6-Mn3-O3   | 77.0(2)  |
| O10-Mn1-O11                   | 87.0(2)   | O2-Mn3-O3   | 92.0(2)  |
| N1-Mn1-O11                    | 91.1(2)   | N3-Mn3-O3   | 101.5(2) |
| O3-Mn1-O7                     | 94.4(2)   | O1-Mn3-O4   | 90.1(2)  |
| O6-Mn1-O7                     | 100.6(2)  | O6-Mn3-O4   | 80.0(2)  |
| O10-Mn1-O7                    | 85.1(2)   | O2-Mn3-O4   | 84.9(2)  |
| N1-Mn1-O7                     | 82.3(2)   | N3-Mn3-O4   | 101.2(2) |
| O3-Mn1-O10                    | 174.0(2)  | O1-Mn3-O2   | 169.0(2) |
| O6-Mn1-N1                     | 167.0(2)  | O6-Mn3-N3   | 175.3(2) |
| O11-Mn1-O7                    | 169.6(2)  | O3-Mn3-O4   | 156.5(2) |
| O8-Mn2-O6                     | 92.7(2)   | O12-Mn4-O2  | 91.0(2)  |
| O5-Mn2-O6                     | 93.7(2)   | O11-Mn4-O2  | 92.7(2)  |
| O8-Mn2-N2                     | 82.5(2)   | O12-Mn4-N4  | 90.9(3)  |
| O5-Mn2-N2                     | 90.8(3)   | O11-Mn4-N4  | 83.8(2)  |
| O8-Mn2-O9                     | 90.0(2)   | O12-Mn4-O8  | 89.4(2)  |
| O5-Mn2-O9                     | 92.5(3)   | O11-Mn4-O8  | 96.1(2)  |
| O6-Mn2-O9                     | 95.9(2)   | O2-Mn4-O8   | 97.4(2)  |
| N2-Mn2-O9                     | 89.6(2)   | N4-Mn4-O8   | 100.5(2) |
| O8-Mn2-O4                     | 92.1(2)   | O12-Mn4-O13 | 82.1(1)  |
| O5-Mn2-O4                     | 86.1(2)   | O11-Mn4-13  | 92.5(9)  |
| O6-Mn2-O4                     | 78.3(2)   | O2-Mn4-13   | 80.6(1)  |
| N2-Mn2-O4                     | 96.4(2)   | N4-Mn4-O13  | 81.8(7)  |
| O8-Mn2-O5                     | 172.9(2)  | O12-Mn4-O11 | 173.0(2) |
| O6-Mn2-N2                     | 172.7(3)  | O2-Mn4-N4   | 162.0(2) |
| O9-Mn2-O4                     | 173.9(2)  | O8-Mn4-O13  | 171.2(3) |
| Mn1-O6-Mn2                    | 136.6(3)  | Mn1-O3-Mn3  | 94.5(2)  |
| Mn1-O6-Mn3                    | 102.8(2)  | Mn1-O11-Mn4 | 124.8(2) |
| Mn2-O6-Mn3                    | 115.9(3)  | Mn2-O8-Mn4  | 126.2(3) |
| Mn2-O4 <sub>DMSO</sub> -      | 85.11(18) | Mn3-O2-Mn4  | 127.2(3) |



|     |  |  |  |
|-----|--|--|--|
| Mn3 |  |  |  |
|-----|--|--|--|

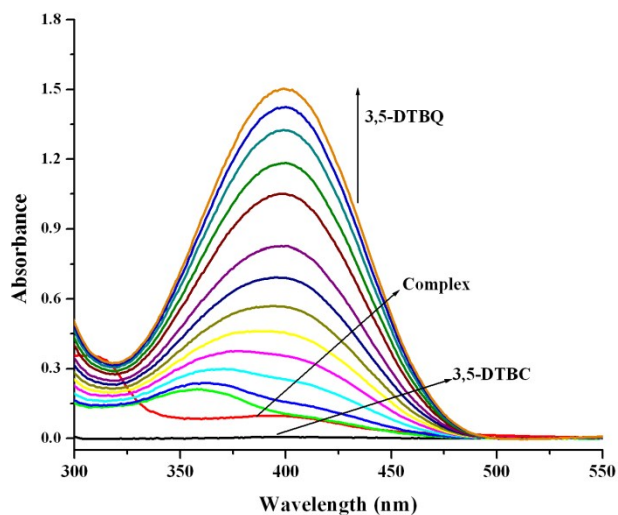

**Fig. S6** Increase of absorption spectra after addition of 100 equiv of 3,5-DTBC to a solution containing complex **2** ( $1 \times 10^{-6}$  M) in MeCN. The spectra were recorded after every 5 min up to 1 h in MeCN.

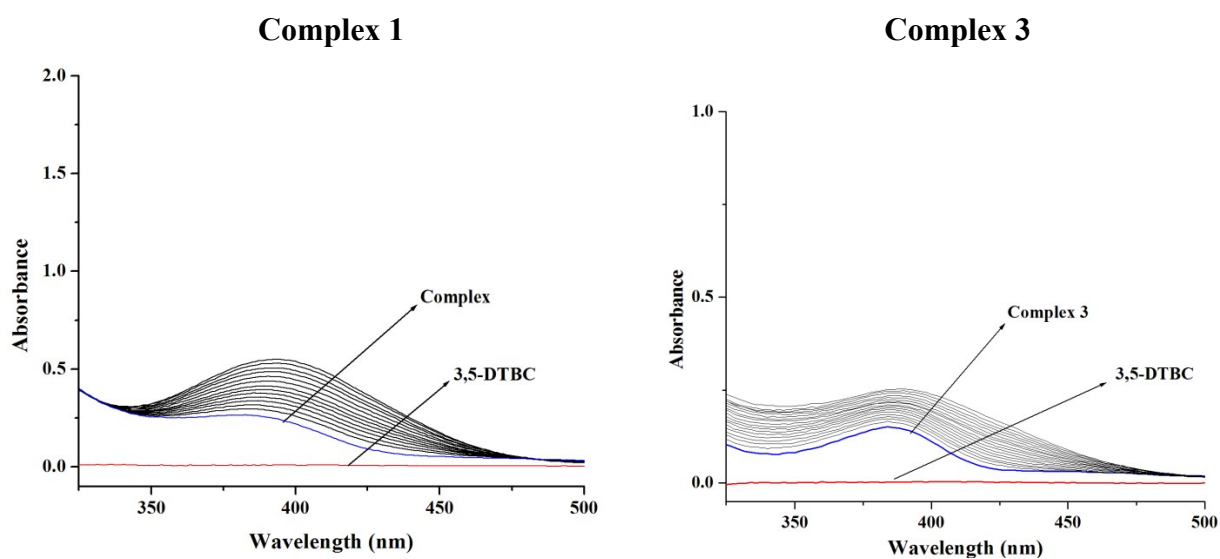

**Fig. S7** Absorption spectra of complexes 1 (left) and 3 (right) ( $1 \times 10^{-6}$  M) with 100 equiv of 3,5-DTBC in MeOH. The spectra were recorded after every 15 min up to 3 h in MeOH.

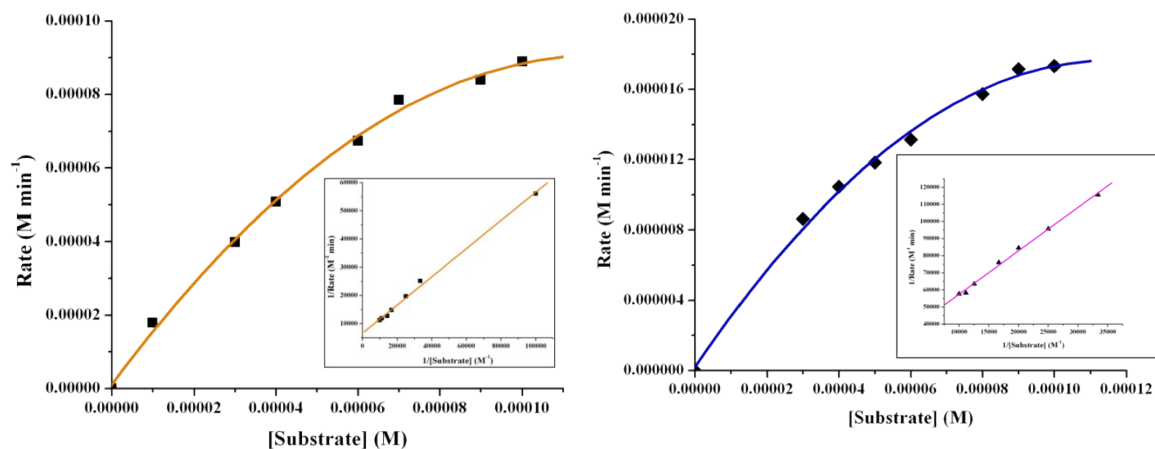

**Fig. S8** Plot of initial rates vs substrate concentration for the oxidation reaction catalyzed by complexes 2 (left) and 4 (right). Inset shows the Lineweaver–Burk plot.

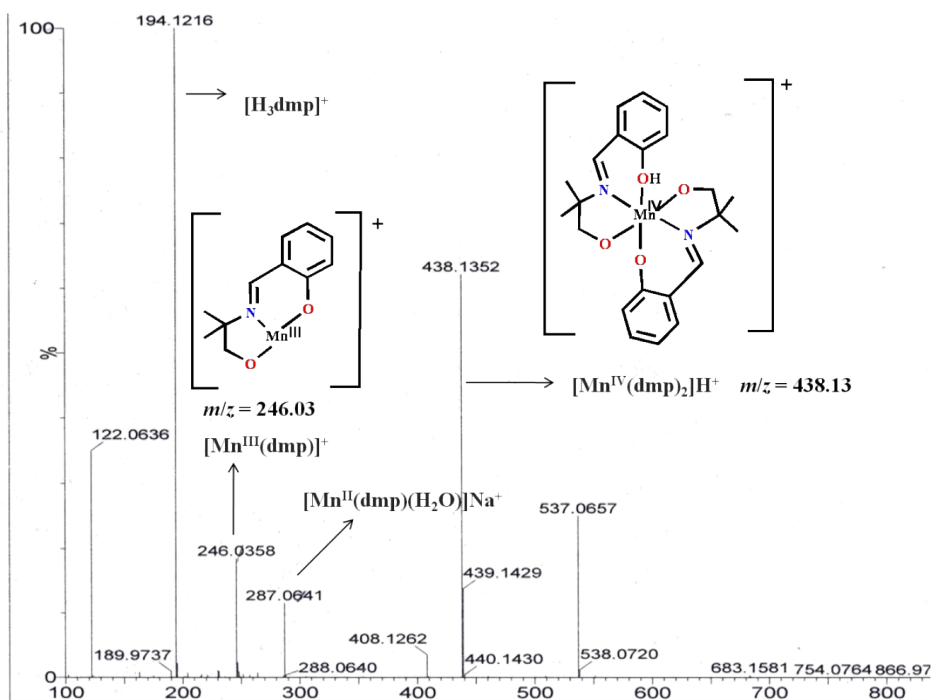

**Fig. S9** Electrospray mass spectrum (ESI-MS positive) of complex **1** in acetonitrile.

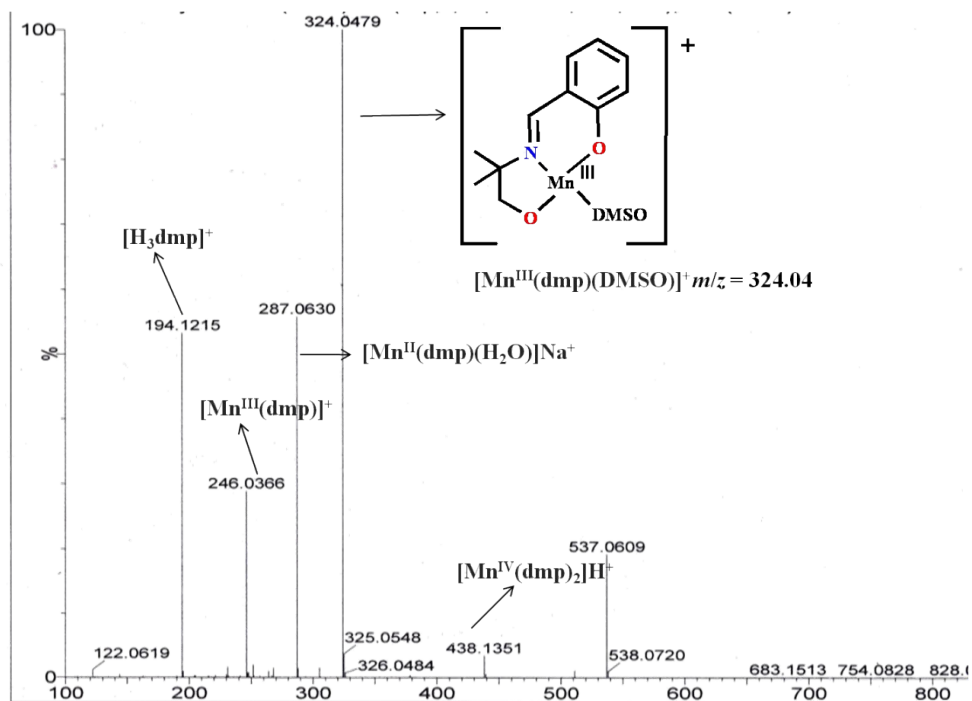

**Fig. S10** Electrospray mass spectrum (ESI-MS positive) of complex **3** in acetonitrile.

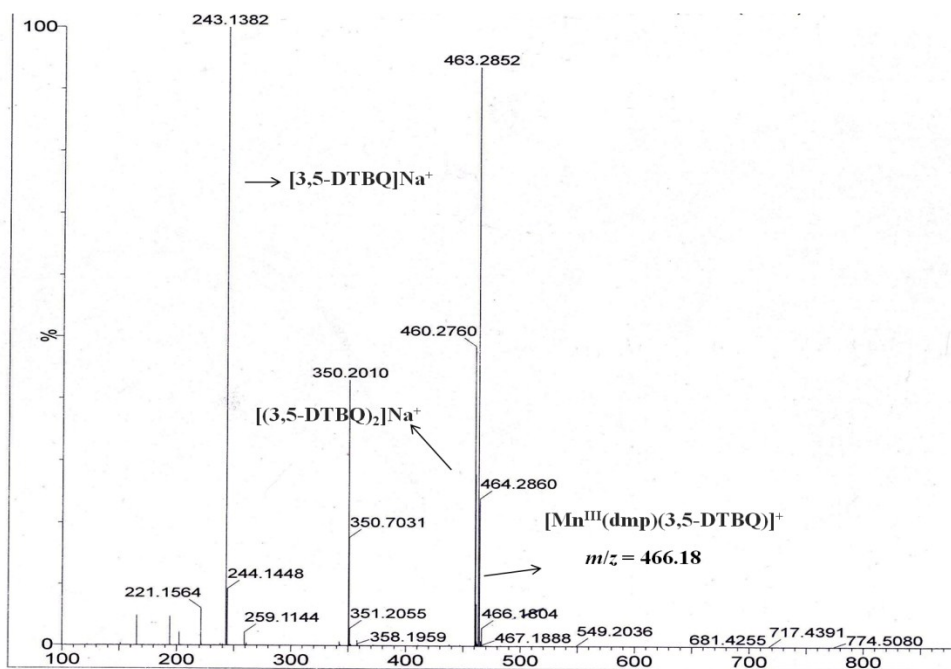

**Fig. S11** Electrospray mass spectrum (ESI-MS positive) of a 1:100 1/3,5-DTBC mixture in

acetonitrile, recorded within 5 min of mixing.

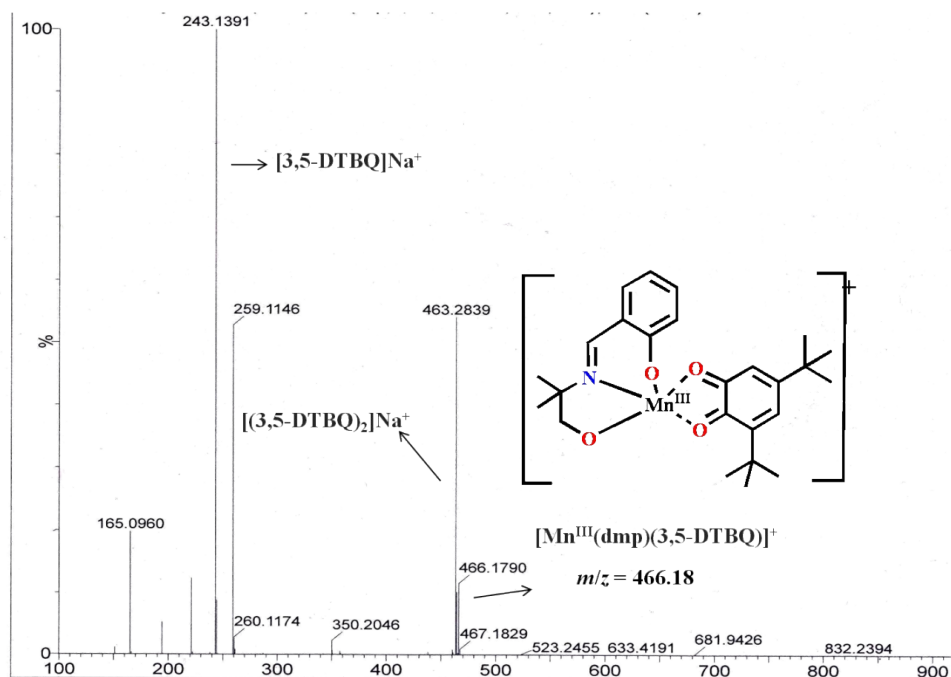

**Fig. S12** Electrospray mass spectrum (ESI-MS positive) of a 1:100 3/3,5-DTBC mixture in acetonitrile, recorded within 5 min of mixing.
